# Supplementary material for: Proline-functionalized chitosan–palladium(ii) complex, a novel nanocatalyst for C–C bond formation in water
Source: Royal Society of Chemistry journal article supplement (doi:10.1039/c5ra01187f), 2015-01-01
Supplement: c5ra01187f1.pdf [file c5ra01187f1.pdf]

# Supporting Information

## **Chitosan-Proline supported palladium (II) a green nanocatalyst for Suzuki cross-coupling reaction in water**

Abdol R. Hajipour<sup>1,2\*</sup>, Elahe Boostani<sup>1</sup>, Fatemeh Mohammadsaleh<sup>1</sup>

<sup>1</sup>*Pharmaceutical Research Laboratory, Department of Chemistry, Isfahan*

*University of Technology, Isfahan 84156, IR Iran, E-mail*

<sup>2</sup>*Department of Pharmacology, University of Wisconsin, Medical School, 1300 University*

*Avenue, Madison, 53706-1532, WI, USA*

---

\*Corresponding author: Tel.: + 98 313 391 3262; fax: + 98 313 391 2350; e-mail:

haji@cc.iut.ac.ir.

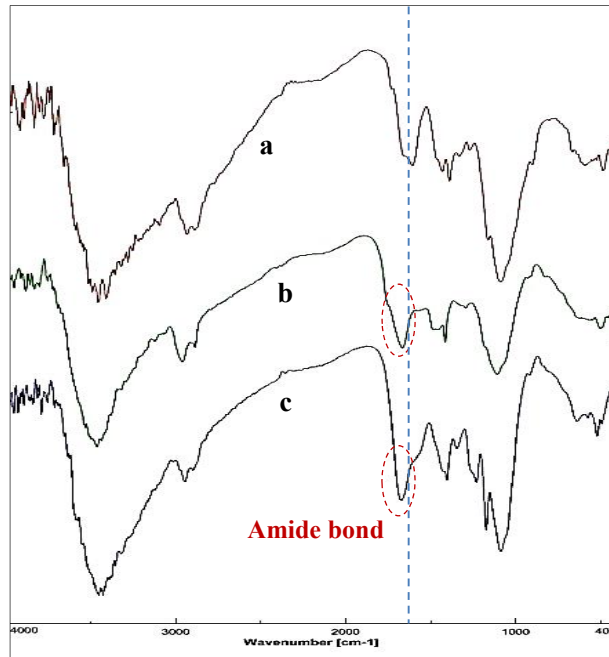

**Fig.** 1FT-IR Spectra. a) Chitosan, b) Chitosan modified by proline, c) CS-proline-Pd (II) complex

## **<sup>1</sup>H-NMR, <sup>13</sup>C-NMR, FT-IR and boiling points of some biaryl derivatives**

### ***Data section***

#### **4-nitro-1,1'-biphenyl**

White solid, melting point: 88°C

<sup>1</sup>H-NMR (400MHz, CDCl<sub>3</sub>, ppm, TMS): δ = 8.3 (d, *J*= 8.7Hz, 2H), 7.7 (d, *J*= 8.7 Hz, 2H), 7.65 (dd, *J*= 1.8, 5.4Hz, 2H), 7.55-7.40 (m, 3H).

<sup>13</sup>C-NMR (100MHz, CDCl<sub>3</sub>, ppm): δ = 147.63, 147.09, 138.75, 129.01, 128.92, 127.81, 127.40, 124.23.

FT-IR (KBr, cm<sup>-1</sup>): ν = 3367, 3242, 1596, 1513, 1345, 853, 739, 699.

#### **9-phenylphenanthrene**

White solid, melting point: 60-62°C

<sup>1</sup>H-NMR (400MHz, ppm, CDCl<sub>3</sub>, TMS) δ = 8.80(d, *J*=8.0 Hz, 1H), 8.74 (d, *J*= 8.4 Hz, 1H), 7.92 (t, *J*= 8.8Hz, 2H), 7.4-7.7 (m, 10H).

<sup>13</sup>C-NMR (100MHz, CDCl<sub>3</sub>, ppm): δ = 140.82, 138.76, 131.54, 131.06, 130.66, 130.02, 129.91, 128.67, 128.30, 127.55, 127.32, 126.93, 126.80, 126.62, 126.49, 126.38, 122.92, 122.51.

FT-IR (KBr, cm<sup>-1</sup>): ν = 3150, 3056, 3021, 1593, 1491, 1450, 893, 746, 700, 588.

#### **4-methoxy-1,1'-biphenyl**

White solid, melting point: 116-118°C

<sup>1</sup>H-NMR (400MHz, ppm, CDCl<sub>3</sub>): δ = 7.44-7.48(t, 2H, *J*= 8.8Hz), 7.31-7.35 (t, 4H, *J*= 8Hz), 7.20-7.24 (t, 1H, *J*= 7.2Hz), 6.89-6.91 (d, 2H, *J*= 8.8 H), 3.77(s, 3H).

<sup>13</sup>C-NMR (100MHz, CDCl<sub>3</sub>, ppm): δ = 141.11, 138.32, 137.08, 129.48, 128.71, 127.10, 126.88, 21.15.

#### **4-Acetylbiphenyl**

White solid, melting point: 119-121°C

$^1\text{H-NMR}$  (400MHz,  $\text{CDCl}_3$ , ppm, TMS):  $\delta = 7.95\text{-}7.97$  (d,  $J=8.4\text{Hz}$ , 2H),  $7.60\text{-}7.62$  (dd,  $J= 8.1, 1.5$  Hz, 2H),  $7.54\text{-}7.56$  (d,  $J= 8.8$  Hz, 2H),  $7.38\text{-}7.41$  (t,  $J= 6$  Hz, 2H),  $7.32\text{-}7.34$  (m, 1H),  $2.56$  (s, 3H).

$^{13}\text{C-NMR}$  (100MHz,  $\text{CDCl}_3$ , ppm):  $\delta = 198.14, 146.21, 140.31, 136.31, 129.38, 129.34, 128.66, 127.70, 127.65, 27.08$ .

FT-IR (KBr,  $\text{cm}^{-1}$ ):  $\nu = 2920, 1726, 1670, 1402, 1268, 1120, 764, 690, 593$ .

*Figure section*

**2-chloro-1,1'-biphenyl**

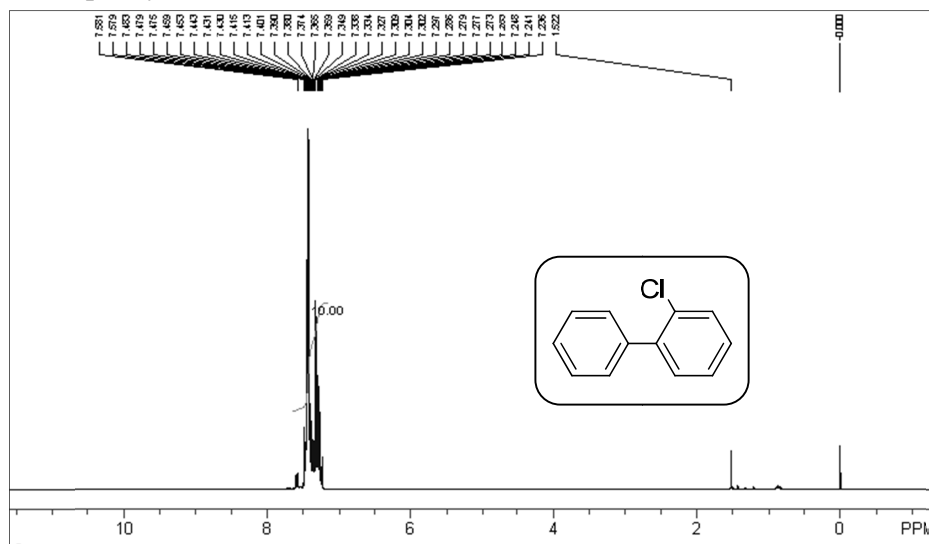

**Fig. 2**  $^1\text{H-NMR}$  (400MHz,  $\text{CDCl}_3$ ) spectrum of 2-chloro-1,1'-biphenyl

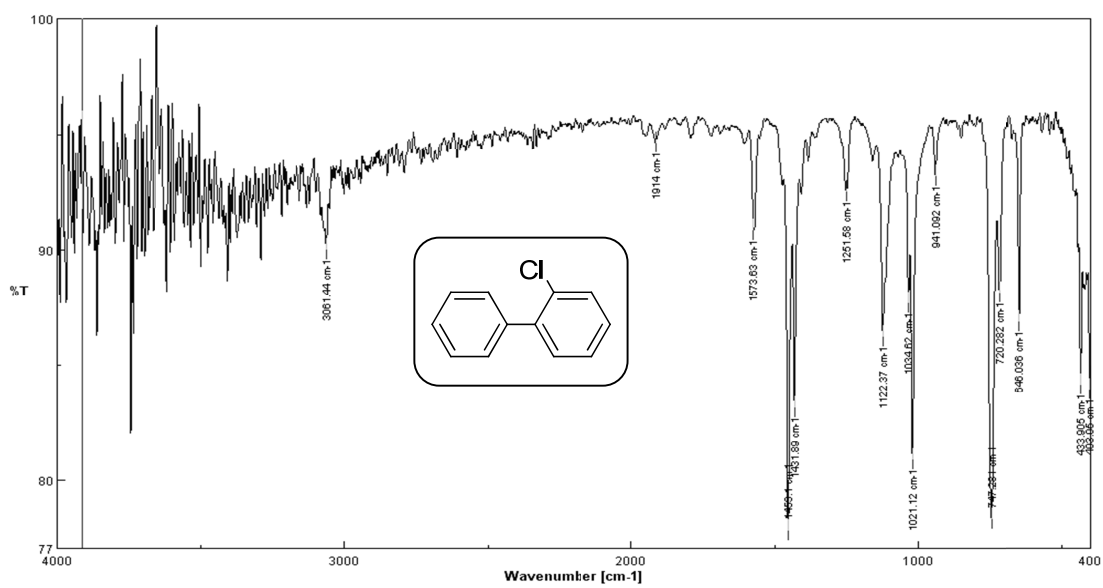

**Fig. 3** FT-IR spectrum of 2-chloro-1,1'-biphenyl

### 4-chloro-1,1'-biphenyl

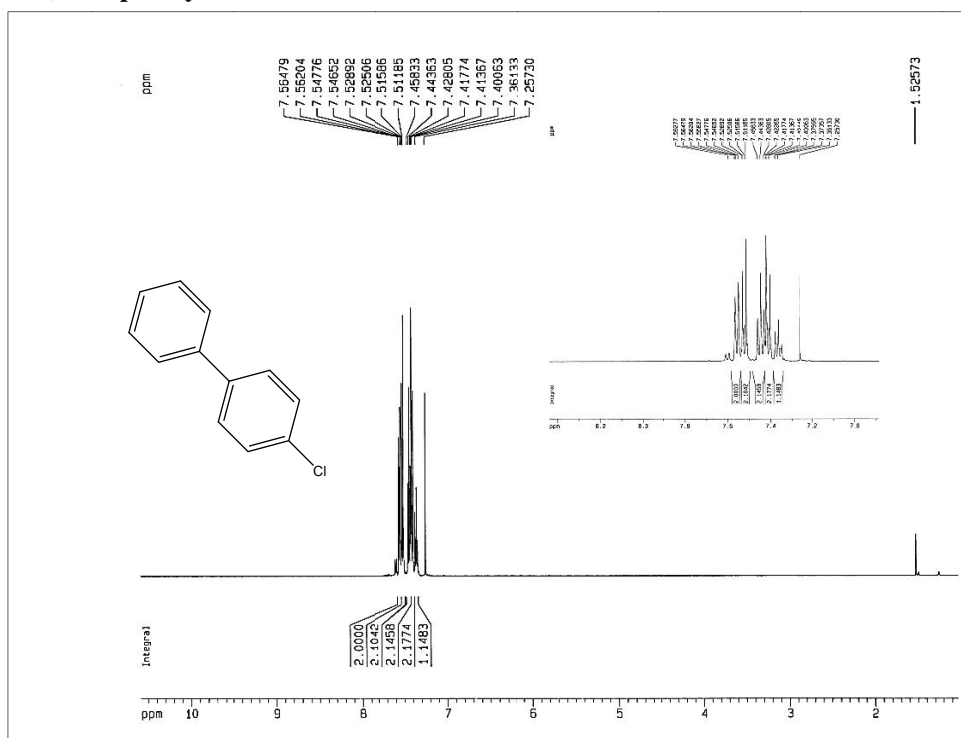

Fig. 4 <sup>1</sup>H-NMR ( 400MHz, CDCl<sub>3</sub>) spectrum of 4-chloro-1,1'-biphenyl

### 1,1'-biphenyl

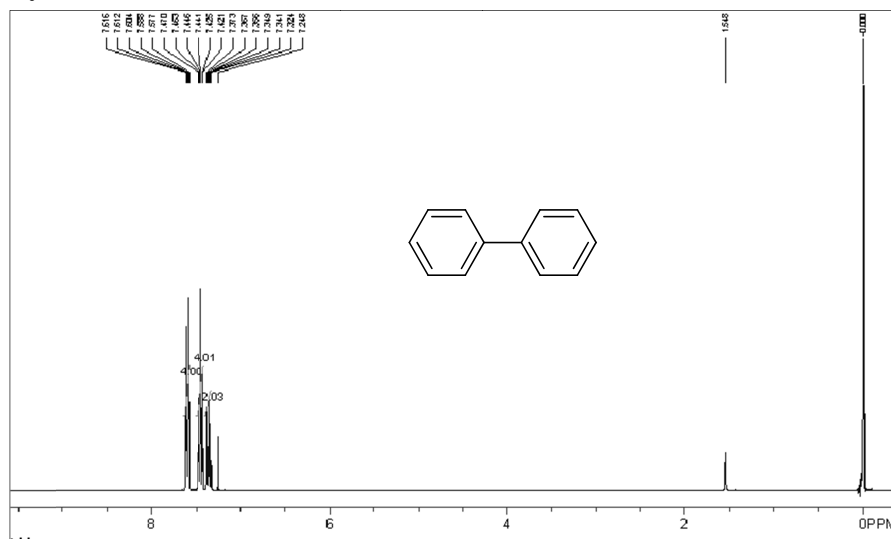

Fig. 5 <sup>1</sup>H-NMR ( 400MHz, CDCl<sub>3</sub>) spectrum of 1,1'-biphenyl

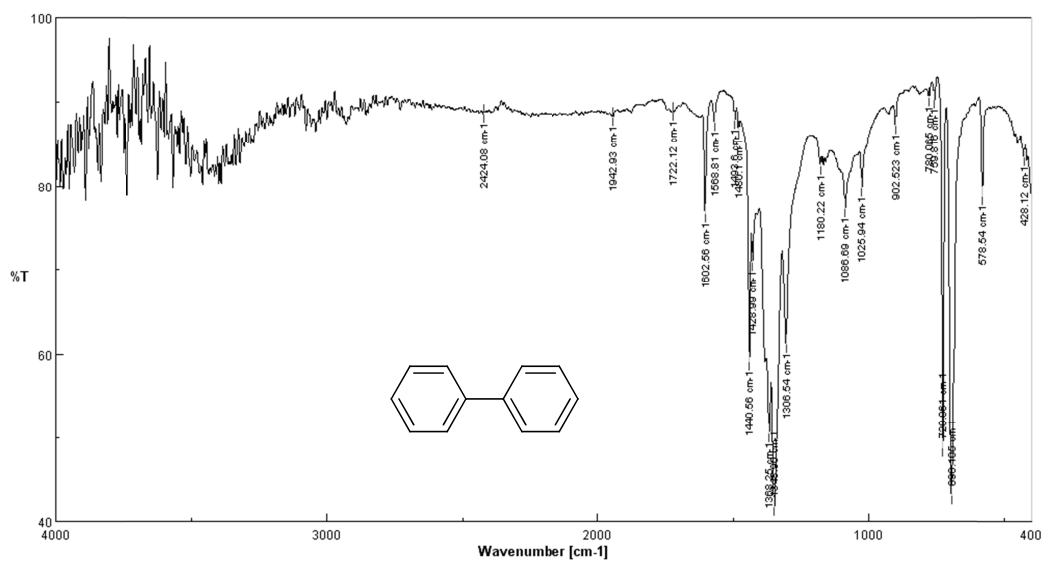

Fig. 6 FT-IR spectrum of 1,1'-biphenyl

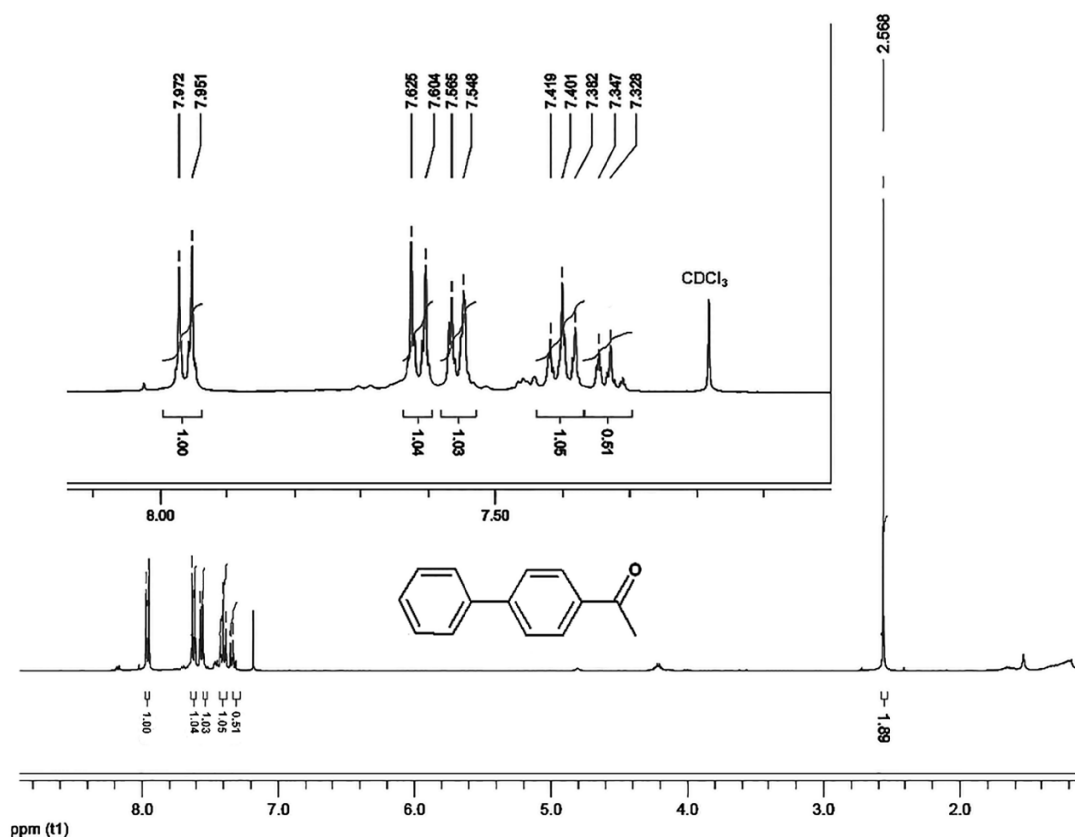

Fig. 7 <sup>1</sup>H-NMR (400MHz, CDCl<sub>3</sub>) spectrum of 4-acetylbiphenyl

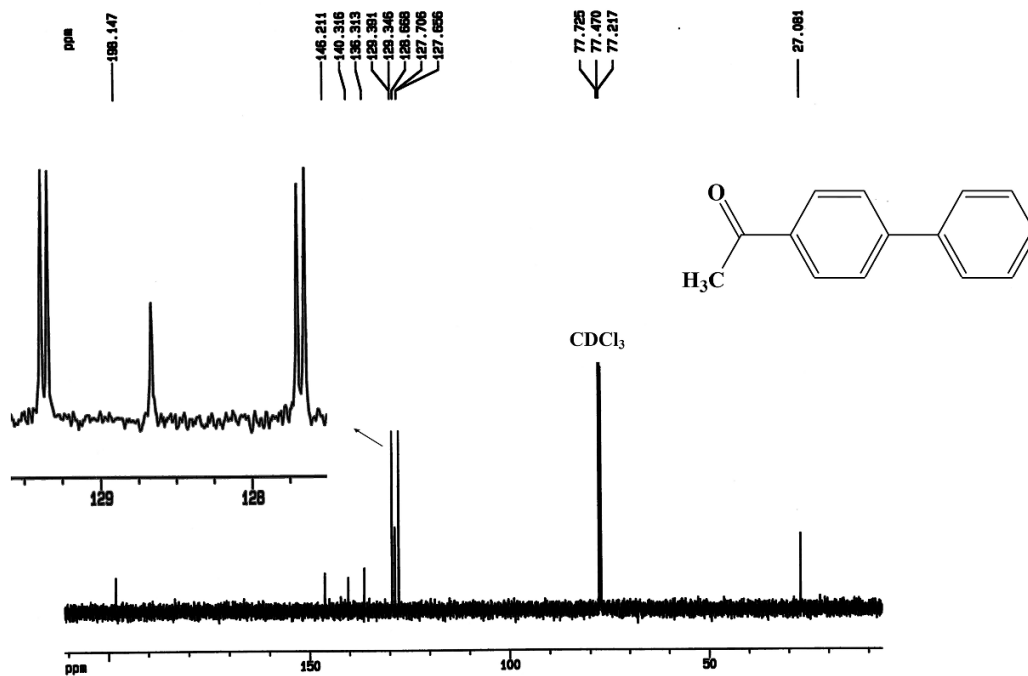

Fig. 8  $^{13}\text{C}$ -NMR (125 MHz,  $\text{CDCl}_3$ ) spectrum of 4-acetylbiphenyl



## GC-MS analysis

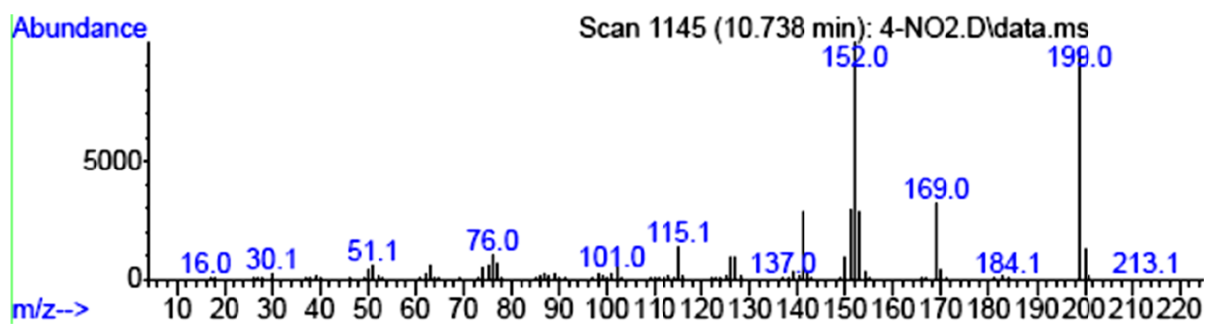

Fig. 9 GC-MS spectrum of 4-nitro-1,1'-biphenyl
